# Supplementary material
Source: bioRxiv or medRxiv preprint supplement (https://www.biorxiv.org/highwire/filestream/22798/field_highwire_adjunct_files/6/081802-7.pdf)

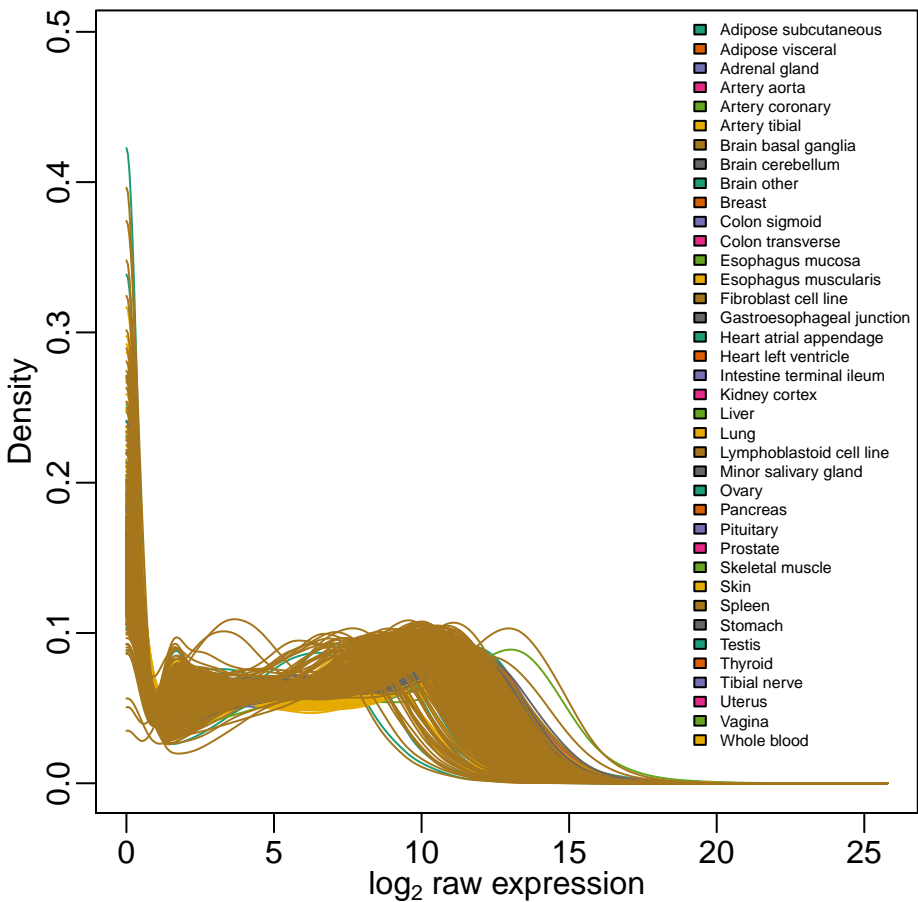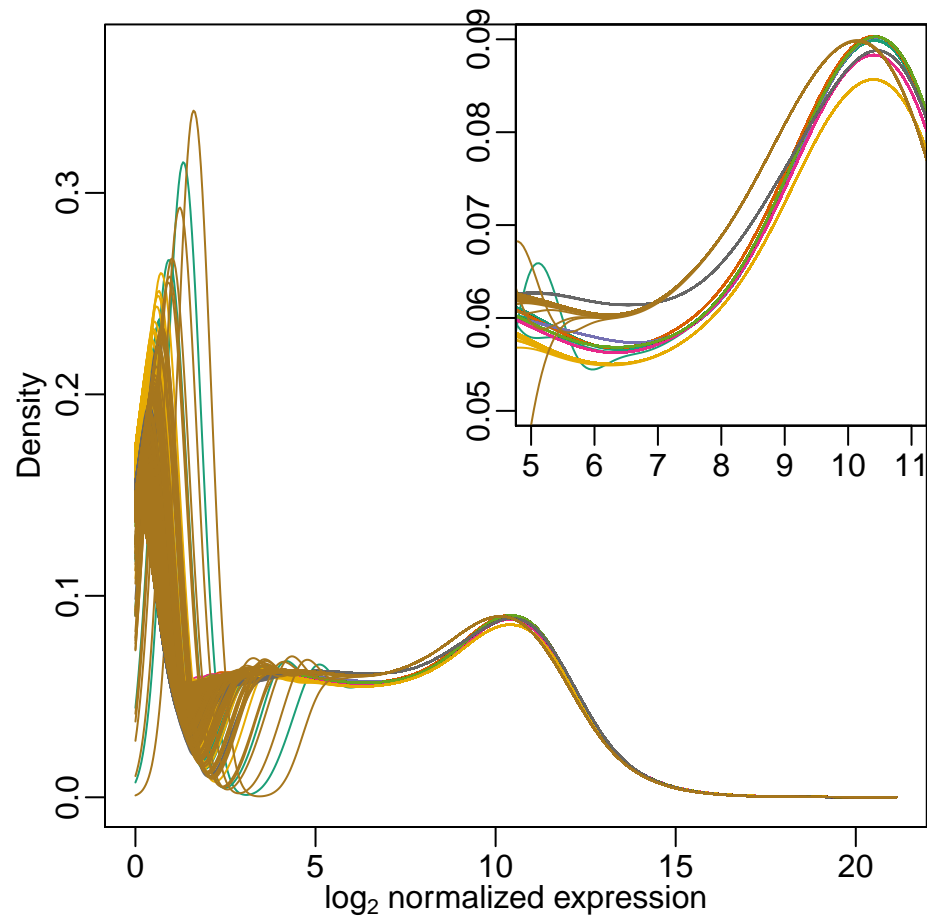

Supplement: Supplementary file [file 081802-7.pdf]
